# Supplementary material for: Emergency Department Patient Satisfaction with Treatment of Low-risk Pulmonary Embolism
Source: PubMed Central journal article supplement (PMC6225929; doi:10.5811/westjem.2018.9.38865), 2018-10-18
Supplement: wjem-19-938-s001.pdf [file wjem-19-938-s001.pdf]

## Appendix 1: Survey of Patients with Low-risk Pulmonary Embolism

1. Overall, how would you rate your health since your ER visit on [date]?  
 Excellent       Very good       Good       Fair       Poor       Very poor
2. Since your ER visit on [date], how much did physical health problems limit your usual physical activities (such as walking or climbing stairs)?  
 Not at all       Very little       Somewhat       Quite a lot       Could not do physical activities
3. Since your ER visit on [date], how much difficulty did you have doing your daily work, both at home and away from home, because of your physical health?  
 None at all       A little bit       Some       Quite a lot       Could not do daily work
4. How much bodily pain have you had during the time since your ER visit on [date]?  
 None       Very mild       Mild       Moderate       Severe       Very severe
5. Since your ER visit on [date], how much energy did you have?  
 Very much       Quite a lot       Some       A little       None
6. Since your ER visit on [date], how much did your physical health or emotional problems limit your usual social activities with family or friends?  
 Not at all       Very little       Somewhat       Quite a lot       Could not do social activities
7. Since your ER visit on [date], how much have you been bothered by emotional problems (such as feeling anxious, depressed or irritable)?  
 Not at all       Slightly       Moderately       Quite a lot       Extremely
8. Since your ER visit on [date], how much did personal or emotional problems keep you from doing your usual work, school or other daily activities?  
 Not at all       Very little       Somewhat       Quite a lot       Could not do daily activities
9. How would you rate your overall hospital care for this episode of blood clot in your lung?  
 Very satisfactory       Satisfactory       Neutral       Unsatisfactory       Very unsatisfactory
10. When you went home from the hospital, you were given instructions for medical care and follow-up. Did you feel those instructions were...  
 Completely clear       Mostly clear       Mostly unclear       Very unclear
11. How do you feel about the length of time that you stayed in the hospital?  
 Prefer to have gone home sooner       Stay was the right length       Prefer to have stayed longer
